# Supplementary material
Source: PubMed Central journal article supplement (PMC4685033)
Supplement: NIHMS734987-supplement-1.pdf [file NIHMS734987-supplement-1.pdf]

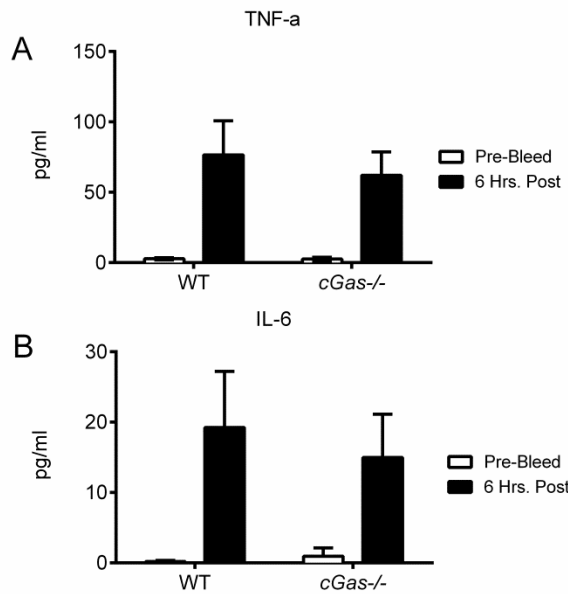

**SUPPLEMENTAL FIGURE 1. *cGas* is dispensable for immune cytokine production.**

WT and *cGas*<sup>-/-</sup> sera were collected pre-vaccination and 6 hours post DNA vaccination. Serum cytokines were quantified from individual mice at a 1:2 dilution using a BD T<sub>h</sub>1/T<sub>h</sub>2/T<sub>h</sub>17 cytokine kit. Shown are (A) TNF- $\alpha$  and (B) IL-6 levels after vaccination with pH1HA encoding DNA vaccine. Data are the averages  $\pm$  SEM of 2 independent studies of 4 mice per group (N=8).
